# Supplementary material
Source: PubMed Central journal article supplement (PMC3392630)

# Supplementary Figure S1

clone 1

clone 3

clone 5

*Casp2*<sup>+/+</sup>

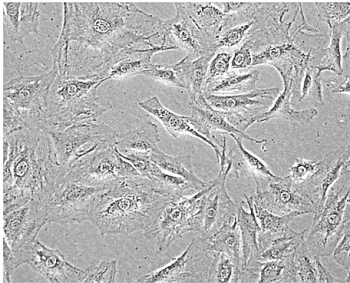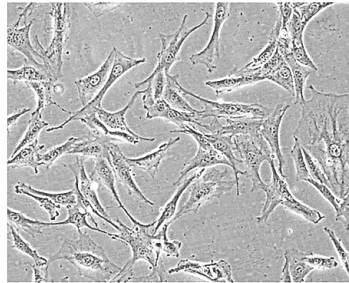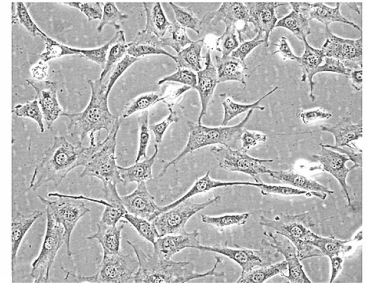

*Casp2*<sup>-/-</sup>

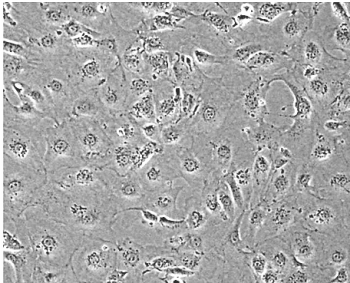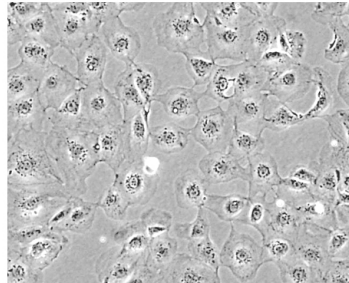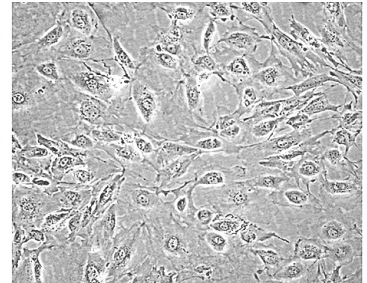

Supplement: cdd201236x2.pdf [file cdd201236x2.pdf]

# Supplementary Figure S2

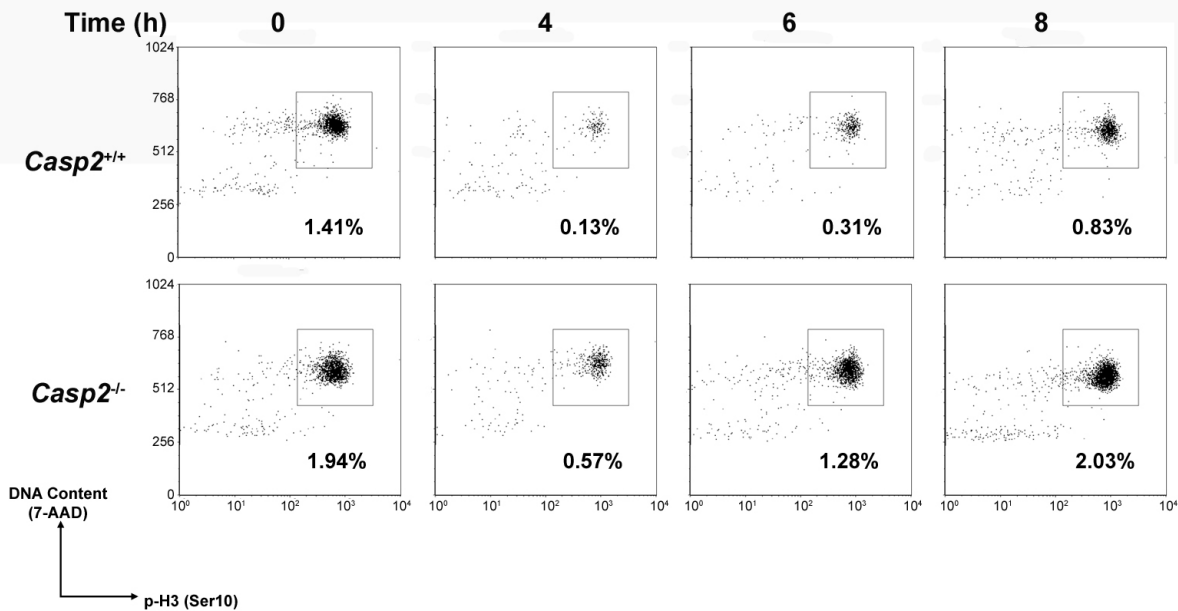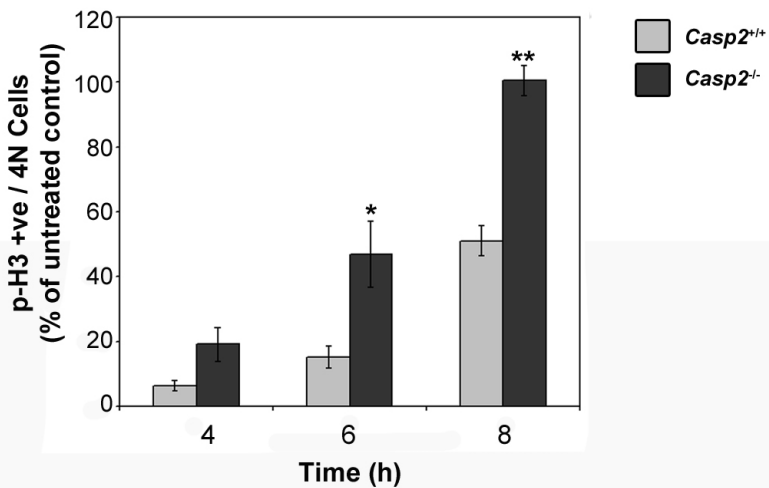

Supplement: cdd201236x3.pdf [file cdd201236x3.pdf]

# Supplementary Figure S3

**a**

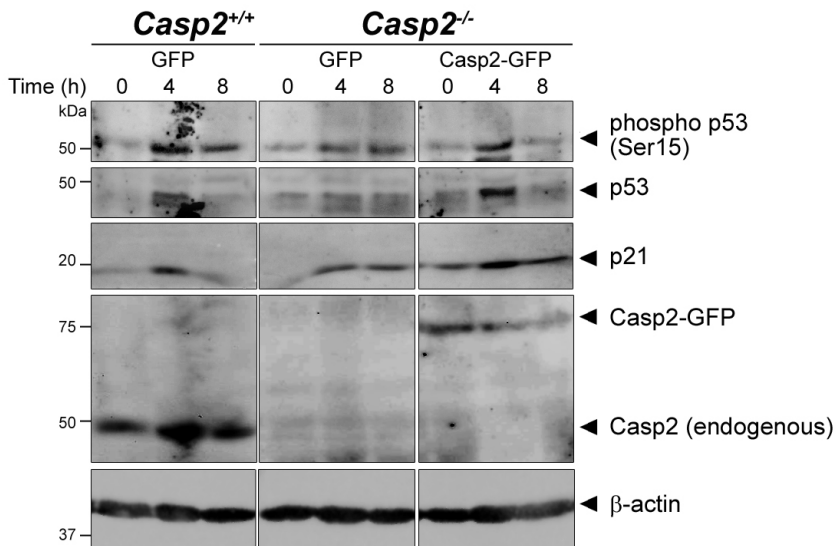

**b**

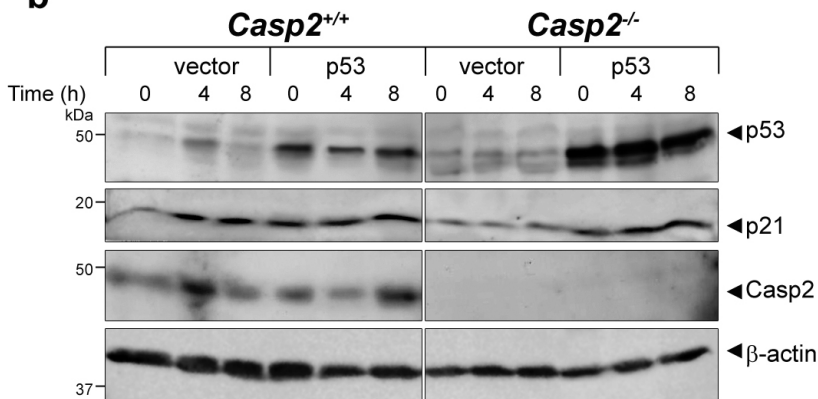

Supplement: cdd201236x4.pdf [file cdd201236x4.pdf]

## Supplementary Figure S4

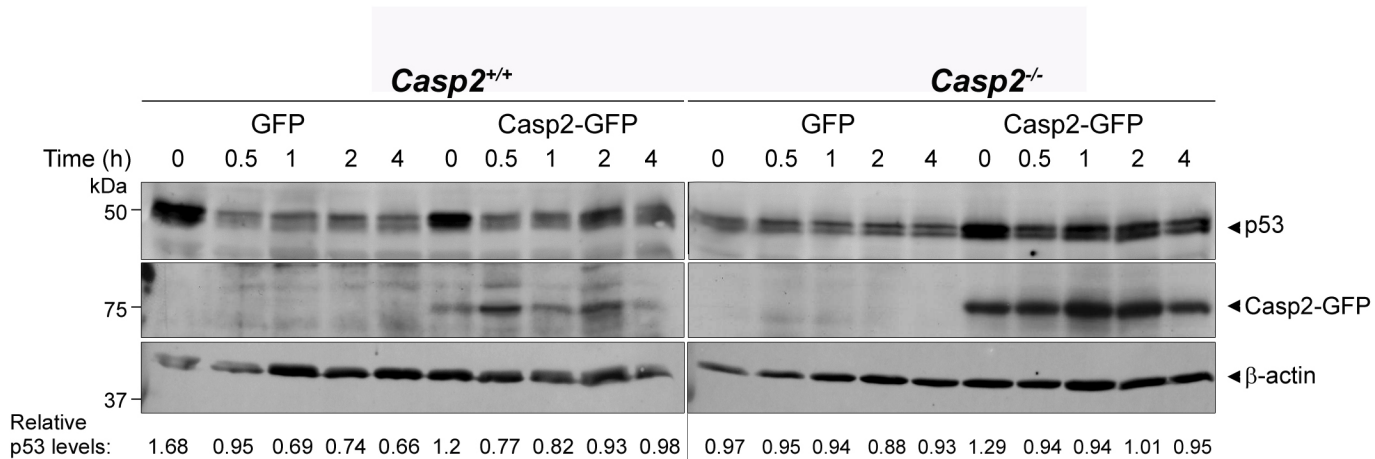

Supplement: cdd201236x5.pdf [file cdd201236x5.pdf]
